# Supplementary material
Source: PubMed Central journal article supplement (PMC4108159)
Supplement: NIHMS553302-supplement-Supplementary_Appendix.pdf [file NIHMS553302-supplement-Supplementary_Appendix.pdf]

Web-based Supplementary Materials for “Assessing the Significance of Global and Local Correlations under Spatial Autocorrelation; a Nonparametric Approach”, by Viladomat, Mazumder, McInturff, McCauley, and Hastie.

# 1 Web Figure 1

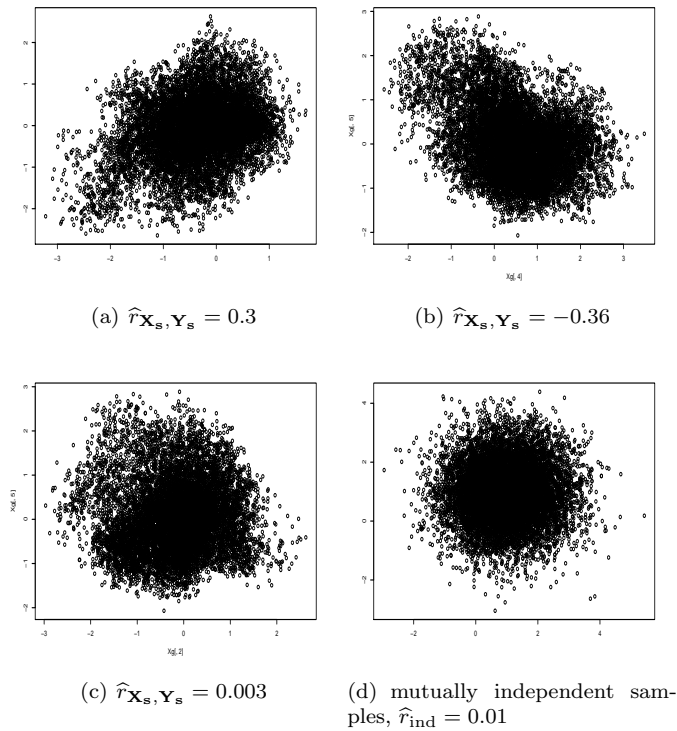

Figure 1: Top left and right, bottom left: three realizations of two pairs of independent and spatially autocorrelated Gaussian random fields  $\mathbf{X}_s$  and  $\mathbf{Y}_s$ , with  $\hat{r}_{\mathbf{X}_s, \mathbf{Y}_s} = 0.30$ ,  $\hat{r}_{\mathbf{X}_s, \mathbf{Y}_s} = -0.36$  and  $\hat{r}_{\mathbf{X}_s, \mathbf{Y}_s} = 0.003$  respectively. The consequences of spatial autocorrelation is that, by chance, the variance of  $r_{\mathbf{X}_s, \mathbf{Y}_s}$  is larger. Bottom, right: two independent samples, each mutually independent and normally distributed (no autocorrelation), with  $\hat{r}_{\text{ind}} = 0.01$ .

## 2 Web Figure 2

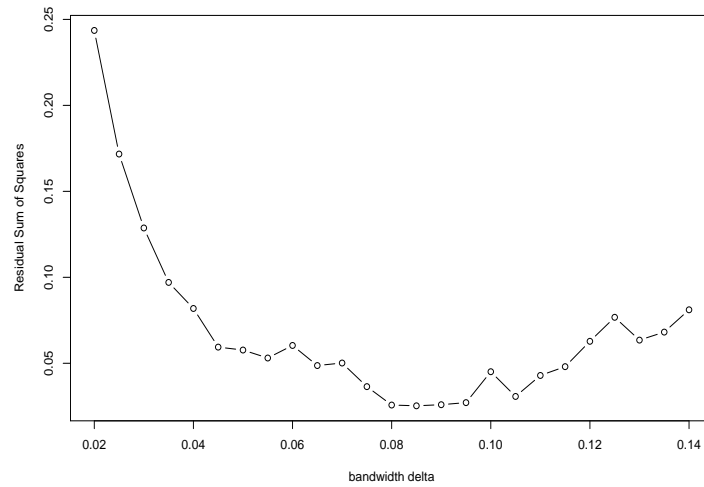

Figure 2: Residual sum of squares of the linear fit between  $\hat{\gamma}(\mathbf{X}_s^\delta)$  and  $\hat{\gamma}(\mathbf{X}_s)$  as a function of the bandwidth  $\delta$ . The minimum value is reached at  $\delta = 0.085$ .

### 3 Web Figure 3

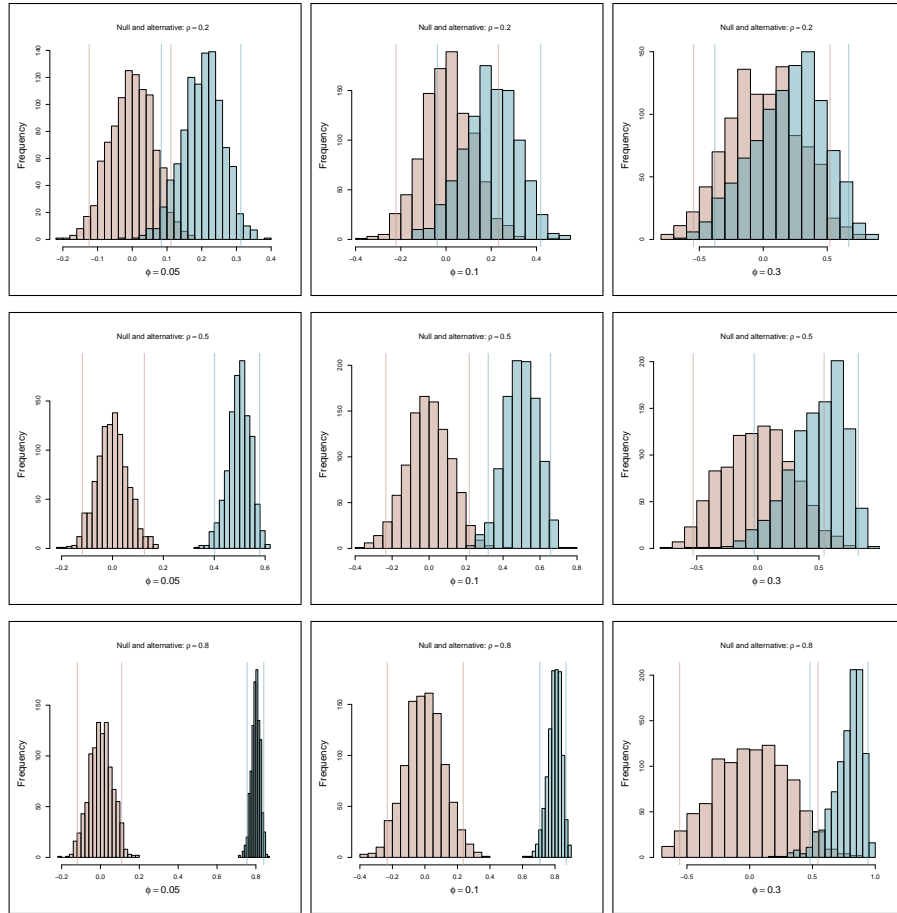

Figure 3: Simulated distributions for  $r_{\mathbf{X}_s, \mathbf{Y}_s}$  under  $H_0: \rho_{\mathbf{X}_s, \mathbf{Y}_s} = 0$  (pink) and  $H_1: \rho_{\mathbf{X}_s, \mathbf{Y}_s} = \rho$  (blue). The 9 scenarios correspond to different effect size and spatial autocorrelation:  $\rho \in (0.2, 0.5, 0.8)$ ,  $\phi \in (0.05, 0.1, 0.3)$ . The lines in the plots indicate the 95% interval points. The grid size is set to  $g = 0.05$  ( $N = 441$ ), but the results are identical for  $g = 0.01$  ( $N = 10,201$ ).

## 4 Web Figure 4

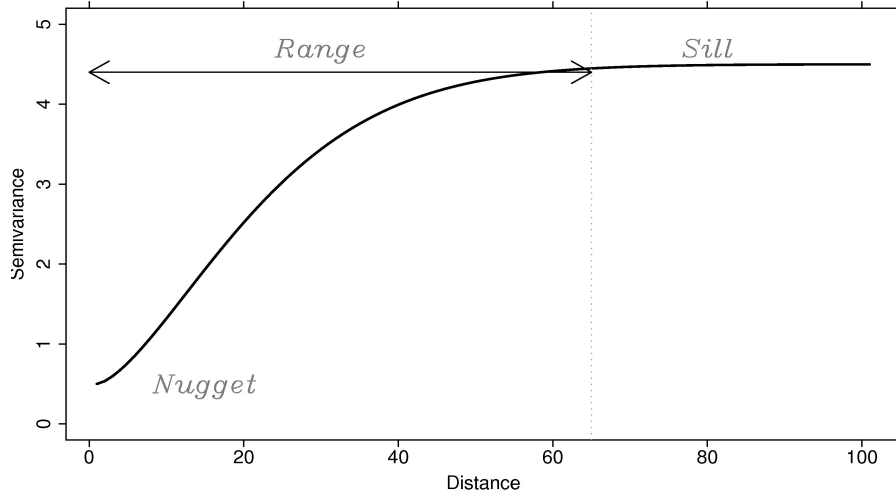

Figure 4: Typical semivariogram of a stationary spatial process:  $\gamma(u) = \sigma^2\{1 - \varphi(u)\} + \tau^2$ . The range is the distance  $u$  at which  $\varphi(u) = 0$ ; i.e. where the autocorrelation function fades away. The intercept is the nugget variance  $\tau^2$ , and the sill is the variance of the process  $\tau^2 + \sigma^2$ .
